# Supplementary material
Source: Springer Nature journal article supplement (https://www.springermedizin.de/resource/supplementary/12958_2012_1059_MOESM5_ESM.pdf/9566434)

## Prospective Study

**a**

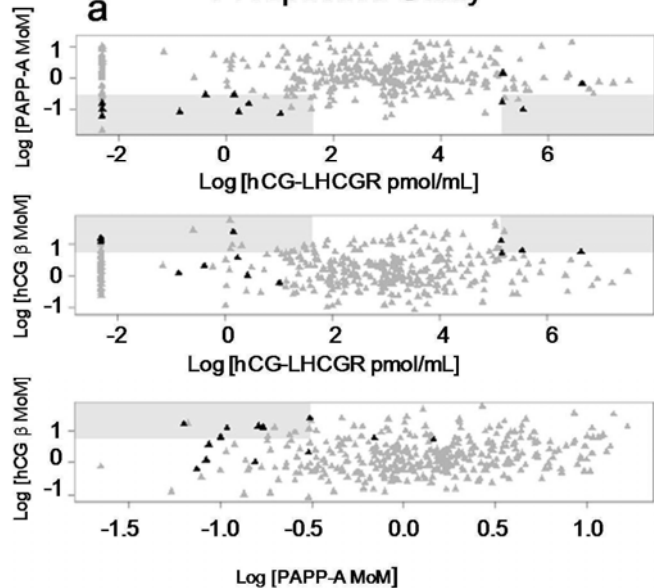

## Retrospective Study

**b**

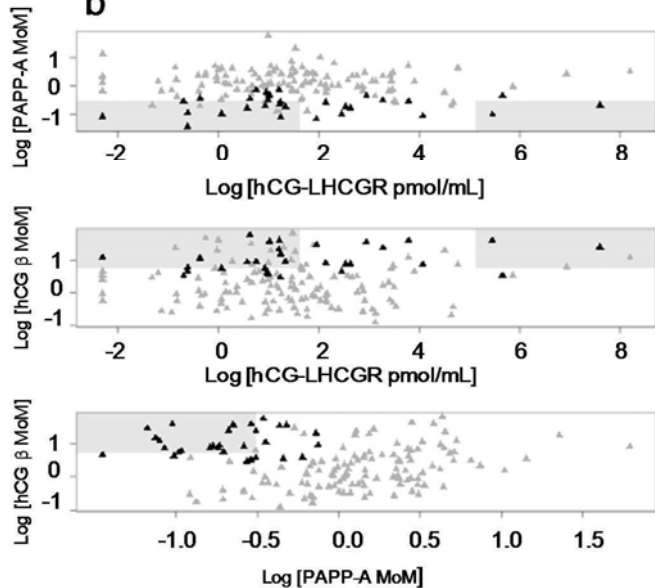

Supplement: MOESM5 [file 9566434]
